# Supplementary material for: Genomic data integration systematically biases interactome mapping
Source: PubMed Central journal article supplement (PMC6192561; doi:10.1371/journal.pcbi.1006474), 2018-10-17

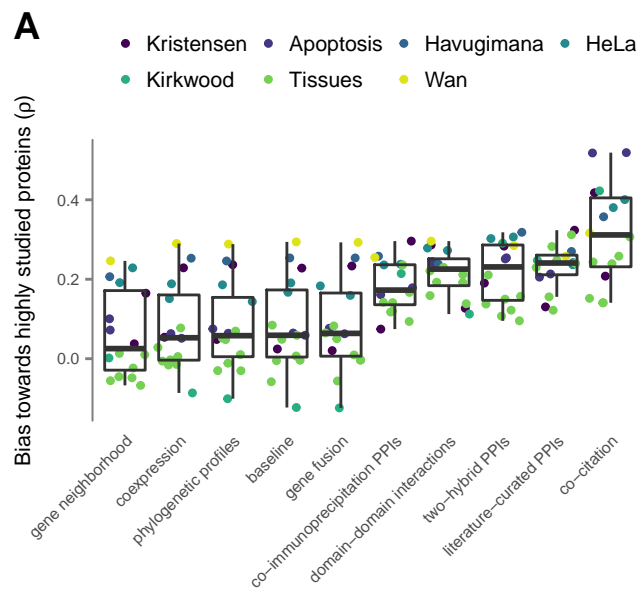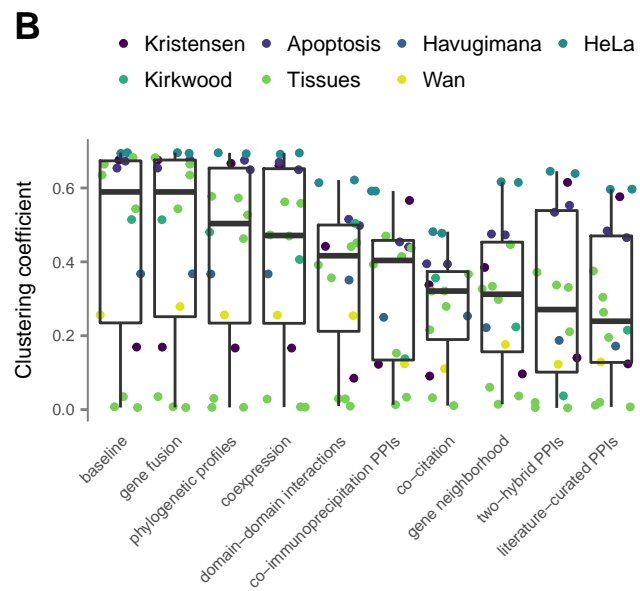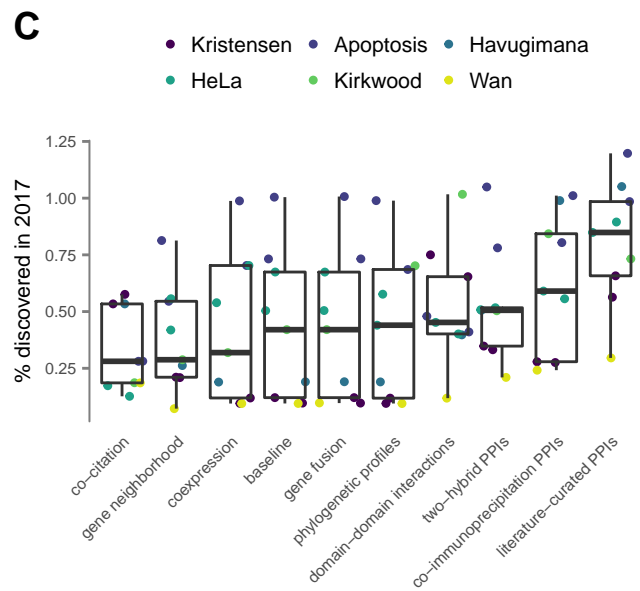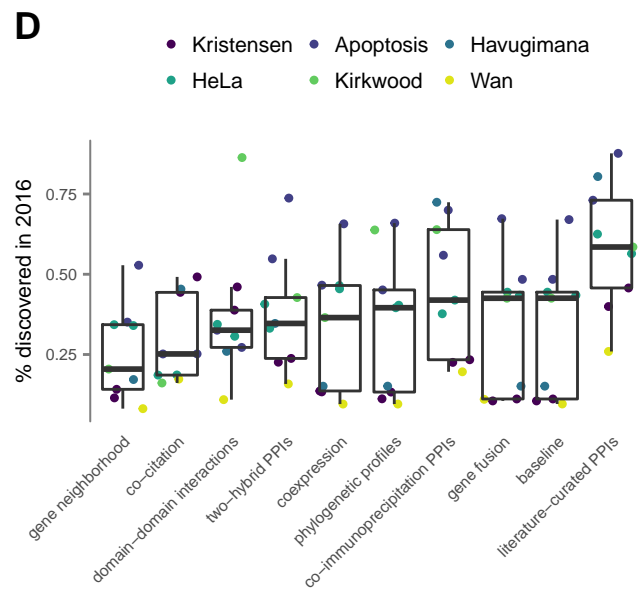

Supplement: pcbi.1006474.s004.pdf [file pcbi.1006474.s004.pdf]
